# Supplementary material
Source: PubMed Central journal article supplement (PMC11153142)

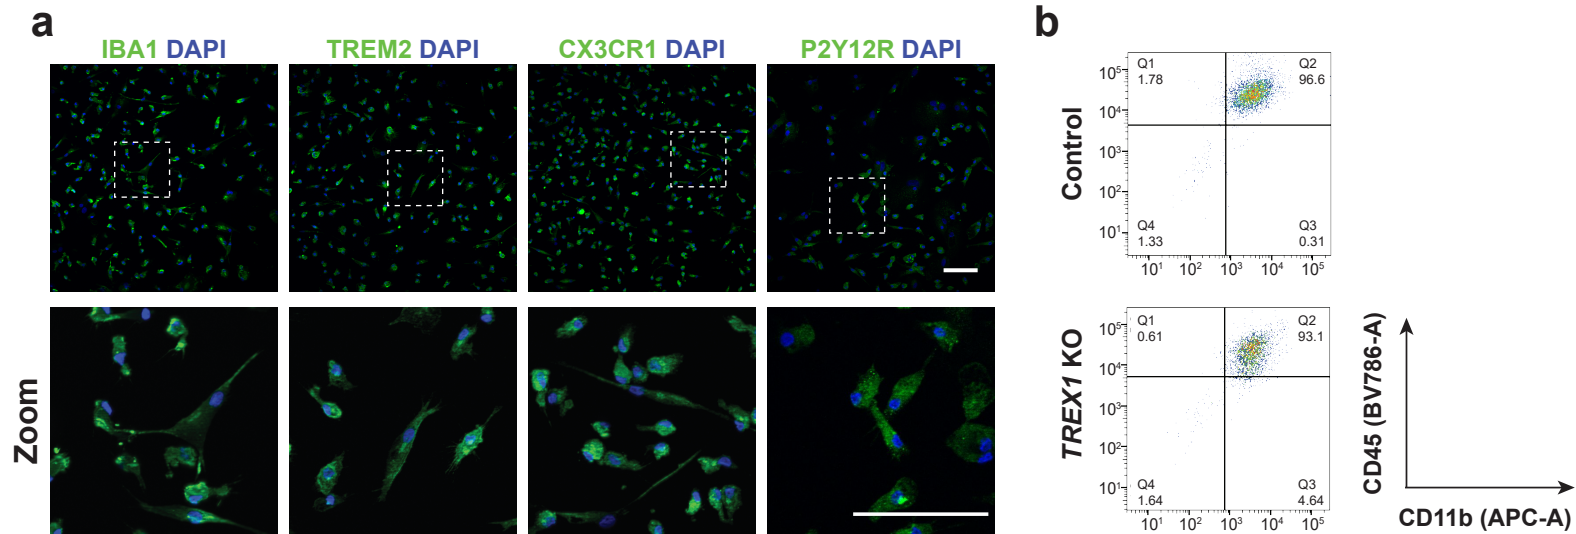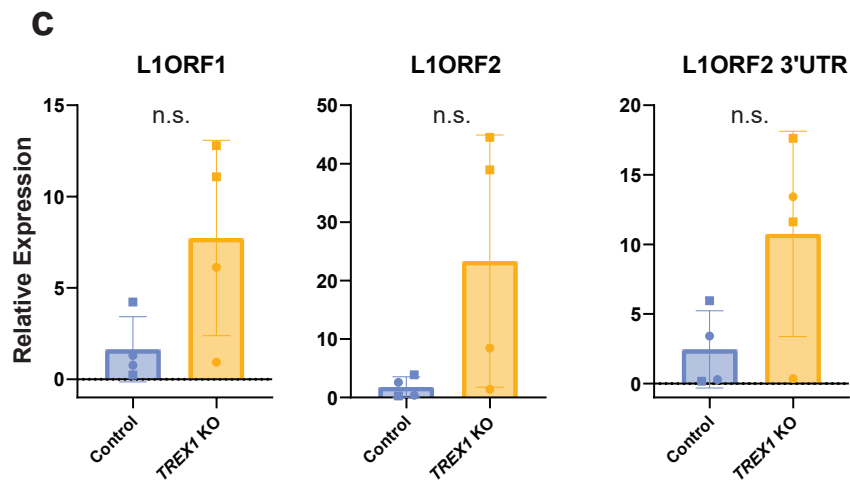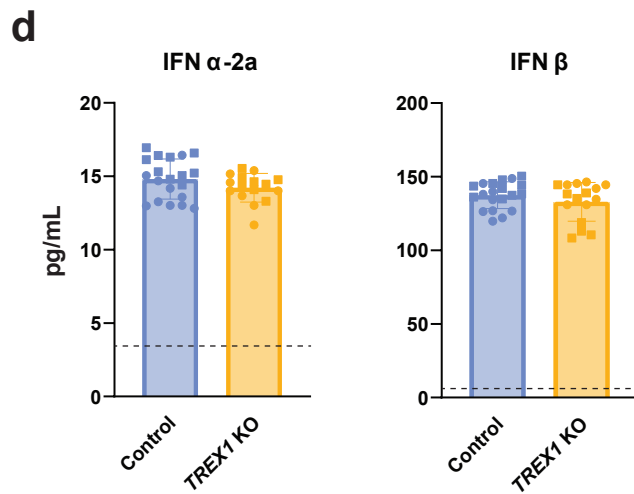

Supplement: 41380_2023_2348_MOESM2_ESM.pdf [file 41380_2023_2348_MOESM2_ESM.pdf]
